# Supplementary material
Source: PubMed Central journal article supplement (PMC4806701)

Web Table 1

| Fixed effects unadjusted (ALL) |     |           | Fixed effects adjusted (ALL) |     |           |
|--------------------------------|-----|-----------|------------------------------|-----|-----------|
| snp                            | chr | pvalue    | snp                          | chr | pvalue    |
| rs2395029                      | 6   | 3.21E-19  | rs2395029                    | 6   | 2.00E-18  |
| rs9264942                      | 6   | 1.09E-12  | rs9264942                    | 6   | 1.20E-12  |
| rs7756521                      | 6   | 5.23E-08  | rs13210132                   | 6   | 3.90E-08  |
| rs13210132                     | 6   | 5.42E-08  | rs7756521                    | 6   | 5.84E-08  |
| rs13191519                     | 6   | 9.91E-08  | rs13191519                   | 6   | 1.10E-07  |
| rs10484554                     | 6   | 1.33E-07  | rs10484554                   | 6   | 1.56E-07  |
| rs2844480                      | 6   | 2.46E-07  | rs2395471                    | 6   | 1.73E-07  |
| rs9468932                      | 6   | 2.94E-07  | rs9468932                    | 6   | 1.78E-07  |
| rs2395471                      | 6   | 3.48E-07  | rs2844480                    | 6   | 5.73E-07  |
| rs9266409                      | 6   | 5.65E-07  | rs2284178                    | 6   | 6.30E-07  |
| rs2284178                      | 6   | 6.36E-07  | rs2248462                    | 6   | 8.83E-07  |
| rs2248462                      | 6   | 7.57E-07  | rs3815087                    | 6   | 9.26E-07  |
| rs3873332                      | 6   | 9.10E-07  | rs3873332                    | 6   | 9.71E-07  |
| rs3815087                      | 6   | 9.17E-07  | rs3873334                    | 6   | 9.74E-07  |
| rs3873334                      | 6   | 9.20E-07  | rs9263715                    | 6   | 9.92E-07  |
| rs9263715                      | 6   | 9.81E-07  | rs9266409                    | 6   | 1.07E-06  |
| rs2516513                      | 6   | 1.34E-06  | rs2516513                    | 6   | 1.57E-06  |
| rs9295928                      | 6   | 1.62E-06  | rs9295928                    | 6   | 1.71E-06  |
| rs2516509                      | 6   | 1.75E-06  | rs2516509                    | 6   | 2.04E-06  |
| rs12697941                     | 6   | 1.97E-06  | rs12697941                   | 6   | 2.09E-06  |
| rs4271174                      | 1   | 4.62E-06  | rs12992718                   | 2   | 3.88E-06  |
| rs4711268                      | 6   | 4.87E-06  | rs4271174                    | 1   | 4.28E-06  |
| rs9368699                      | 6   | 5.20E-06  | rs3871466                    | 6   | 4.36E-06  |
| rs4711269                      | 6   | 5.23E-06  | rs4711268                    | 6   | 6.92E-06  |
| rs3871466                      | 6   | 5.30E-06  | rs3823418                    | 6   | 7.29E-06  |
| rs9378200                      | 6   | 5.86E-06  | rs4711269                    | 6   | 7.43E-06  |
| rs13437082                     | 6   | 6.10E-06  | rs2523619                    | 6   | 7.51E-06  |
| rs12992718                     | 2   | 7.03E-06  | rs6457374                    | 6   | 8.63E-06  |
| rs2523619                      | 6   | 7.66E-06  | rs13437082                   | 6   | 8.64E-06  |
| rs12185555                     | 2   | 9.69E-06  | rs6740435                    | 2   | 8.81E-06  |
| rs3823418                      | 6   | 9.92E-06  | rs3094212                    | 6   | 0.0000107 |
| rs9469003                      | 6   | 0.0000128 | rs9378200                    | 6   | 0.0000116 |
| rs6932730                      | 6   | 0.0000138 | rs1876865                    | 18  | 0.0000127 |
| rs1876865                      | 18  | 0.0000143 | rs13198118                   | 6   | 0.0000141 |
| rs6457374                      | 6   | 0.0000145 | rs9368699                    | 6   | 0.0000142 |
| rs13198118                     | 6   | 0.0000146 | rs4601099                    | 6   | 0.0000143 |
| rs9348876                      | 6   | 0.0000149 | rs2247056                    | 6   | 0.0000165 |
| rs9501106                      | 6   | 0.0000151 | rs12185555                   | 2   | 0.0000167 |
| rs6740435                      | 2   | 0.0000166 | rs13410278                   | 2   | 0.0000178 |
| rs3094212                      | 6   | 0.0000183 | rs6932730                    | 6   | 0.0000189 |
| rs4601099                      | 6   | 0.0000198 | rs2523554                    | 6   | 0.0000192 |
| rs6793679                      | 3   | 0.0000212 | rs2556568                    | 15  | 0.0000203 |
| rs4713380                      | 6   | 0.0000215 | rs6793679                    | 3   | 0.0000208 |
| rs2523554                      | 6   | 0.0000215 | rs4713380                    | 6   | 0.0000209 |
| rs2297374                      | 6   | 0.0000216 | rs9469003                    | 6   | 0.000021  |
| rs3093662                      | 6   | 0.0000228 | rs9501106                    | 6   | 0.0000246 |
| rs4713385                      | 6   | 0.0000258 | rs4713385                    | 6   | 0.0000251 |

|            |    |           |            |    |           |
|------------|----|-----------|------------|----|-----------|
| rs1508833  | 5  | 0.0000263 | rs9895288  | 17 | 0.0000256 |
| rs2247056  | 6  | 0.0000271 | rs9348876  | 6  | 0.0000288 |
| rs9895288  | 17 | 0.0000302 | rs2161800  | 18 | 0.0000318 |
| rs6838261  | 4  | 0.0000307 | rs6838261  | 4  | 0.0000355 |
| rs1002063  | 1  | 0.0000323 | rs1002063  | 1  | 0.0000389 |
| rs13410278 | 2  | 0.0000323 | rs2297374  | 6  | 0.0000403 |
| rs10016814 | 4  | 0.0000373 | rs1508833  | 5  | 0.0000458 |
| rs2556568  | 15 | 0.0000405 | rs185819   | 6  | 0.0000458 |
| rs13145735 | 4  | 0.0000421 | rs11760555 | 7  | 0.0000484 |
| rs4607472  | 6  | 0.0000427 | rs3093662  | 6  | 0.0000524 |
| rs1051794  | 6  | 0.0000489 | rs3130380  | 6  | 0.0000537 |
| rs2161800  | 18 | 0.0000518 | rs12706865 | 7  | 0.0000546 |
| rs12706865 | 7  | 0.000057  | rs2862260  | 18 | 0.0000569 |
| rs1548842  | 16 | 0.0000588 | rs9395021  | 6  | 0.0000574 |
| rs8101643  | 19 | 0.0000632 | rs8321     | 6  | 0.0000596 |
| rs3130380  | 6  | 0.0000633 | rs3130542  | 6  | 0.0000604 |
| rs284509   | 6  | 0.0000651 | rs1548842  | 16 | 0.000061  |
| rs9749580  | 19 | 0.0000654 | rs12955201 | 18 | 0.0000617 |
| rs2780623  | 1  | 0.0000664 | rs284509   | 6  | 0.0000624 |
| rs9395021  | 6  | 0.0000691 | rs10016814 | 4  | 0.0000624 |
| rs185819   | 6  | 0.0000702 | rs4607472  | 6  | 0.0000702 |
| rs3130542  | 6  | 0.0000712 | rs9807399  | 18 | 0.0000712 |
| rs8321     | 6  | 0.0000712 | rs6119304  | 20 | 0.0000716 |
| rs2017912  | 11 | 0.0000737 | rs886424   | 6  | 0.0000721 |
| rs17805145 | 17 | 0.0000749 | rs11657185 | 17 | 0.0000735 |
| rs6119304  | 20 | 0.000078  | rs3132685  | 6  | 0.0000737 |
| rs1354718  | 1  | 0.0000814 | rs13145735 | 4  | 0.0000772 |
| rs886424   | 6  | 0.0000815 | rs2780623  | 1  | 0.0000785 |
| rs10504885 | 8  | 0.0000835 | rs17805145 | 17 | 0.0000791 |
| rs3132685  | 6  | 0.0000854 | rs1354718  | 1  | 0.0000797 |
| rs12955201 | 18 | 0.0000869 | rs3006925  | 1  | 0.0000839 |
| rs11650232 | 17 | 0.0000871 | rs8101643  | 19 | 0.0000867 |
| rs11760555 | 7  | 0.0000885 | rs7940296  | 11 | 0.0000889 |
| rs3006925  | 1  | 0.0000891 | rs9749580  | 19 | 0.0000901 |
| rs766857   | 10 | 0.0000914 | rs9262143  | 6  | 0.0000956 |
| rs2862260  | 18 | 0.0000997 | rs2490393  | 1  | 0.0000958 |
| rs9807399  | 18 | 0.0001002 | rs11650232 | 17 | 0.000099  |
| rs2490393  | 1  | 0.0001022 | rs1051794  | 6  | 0.0000998 |
| rs3130055  | 6  | 0.0001025 | rs314253   | 17 | 0.0001021 |
| rs4583528  | 20 | 0.00011   | rs11130079 | 3  | 0.0001052 |
| rs9262143  | 6  | 0.0001109 | rs6592078  | 11 | 0.0001054 |
| rs10142247 | 14 | 0.0001121 | rs12646901 | 4  | 0.0001057 |
| rs11130079 | 3  | 0.0001123 | rs2877652  | 1  | 0.0001073 |
| rs2523608  | 6  | 0.0001152 | rs3130055  | 6  | 0.0001088 |
| rs11657185 | 17 | 0.0001159 | rs4583528  | 20 | 0.0001103 |
| rs2516393  | 6  | 0.0001165 | rs11655540 | 17 | 0.0001117 |
| rs3093978  | 6  | 0.0001165 | rs2017912  | 11 | 0.0001149 |
| rs314253   | 17 | 0.0001208 | rs6494562  | 15 | 0.0001192 |
| rs12900903 | 15 | 0.0001217 | rs2516393  | 6  | 0.0001211 |

|            |    |           |  |           |    |           |
|------------|----|-----------|--|-----------|----|-----------|
| rs2877652  | 1  | 0.0001278 |  | rs3093978 | 6  | 0.0001211 |
| rs12646901 | 4  | 0.0001286 |  | rs4790700 | 17 | 0.0001248 |
| rs7940296  | 11 | 0.0001325 |  | rs950141  | 9  | 0.0001275 |
| rs10115111 | 9  | 0.0001326 |  | rs4861137 | 4  | 0.0001284 |

Web Figure 1

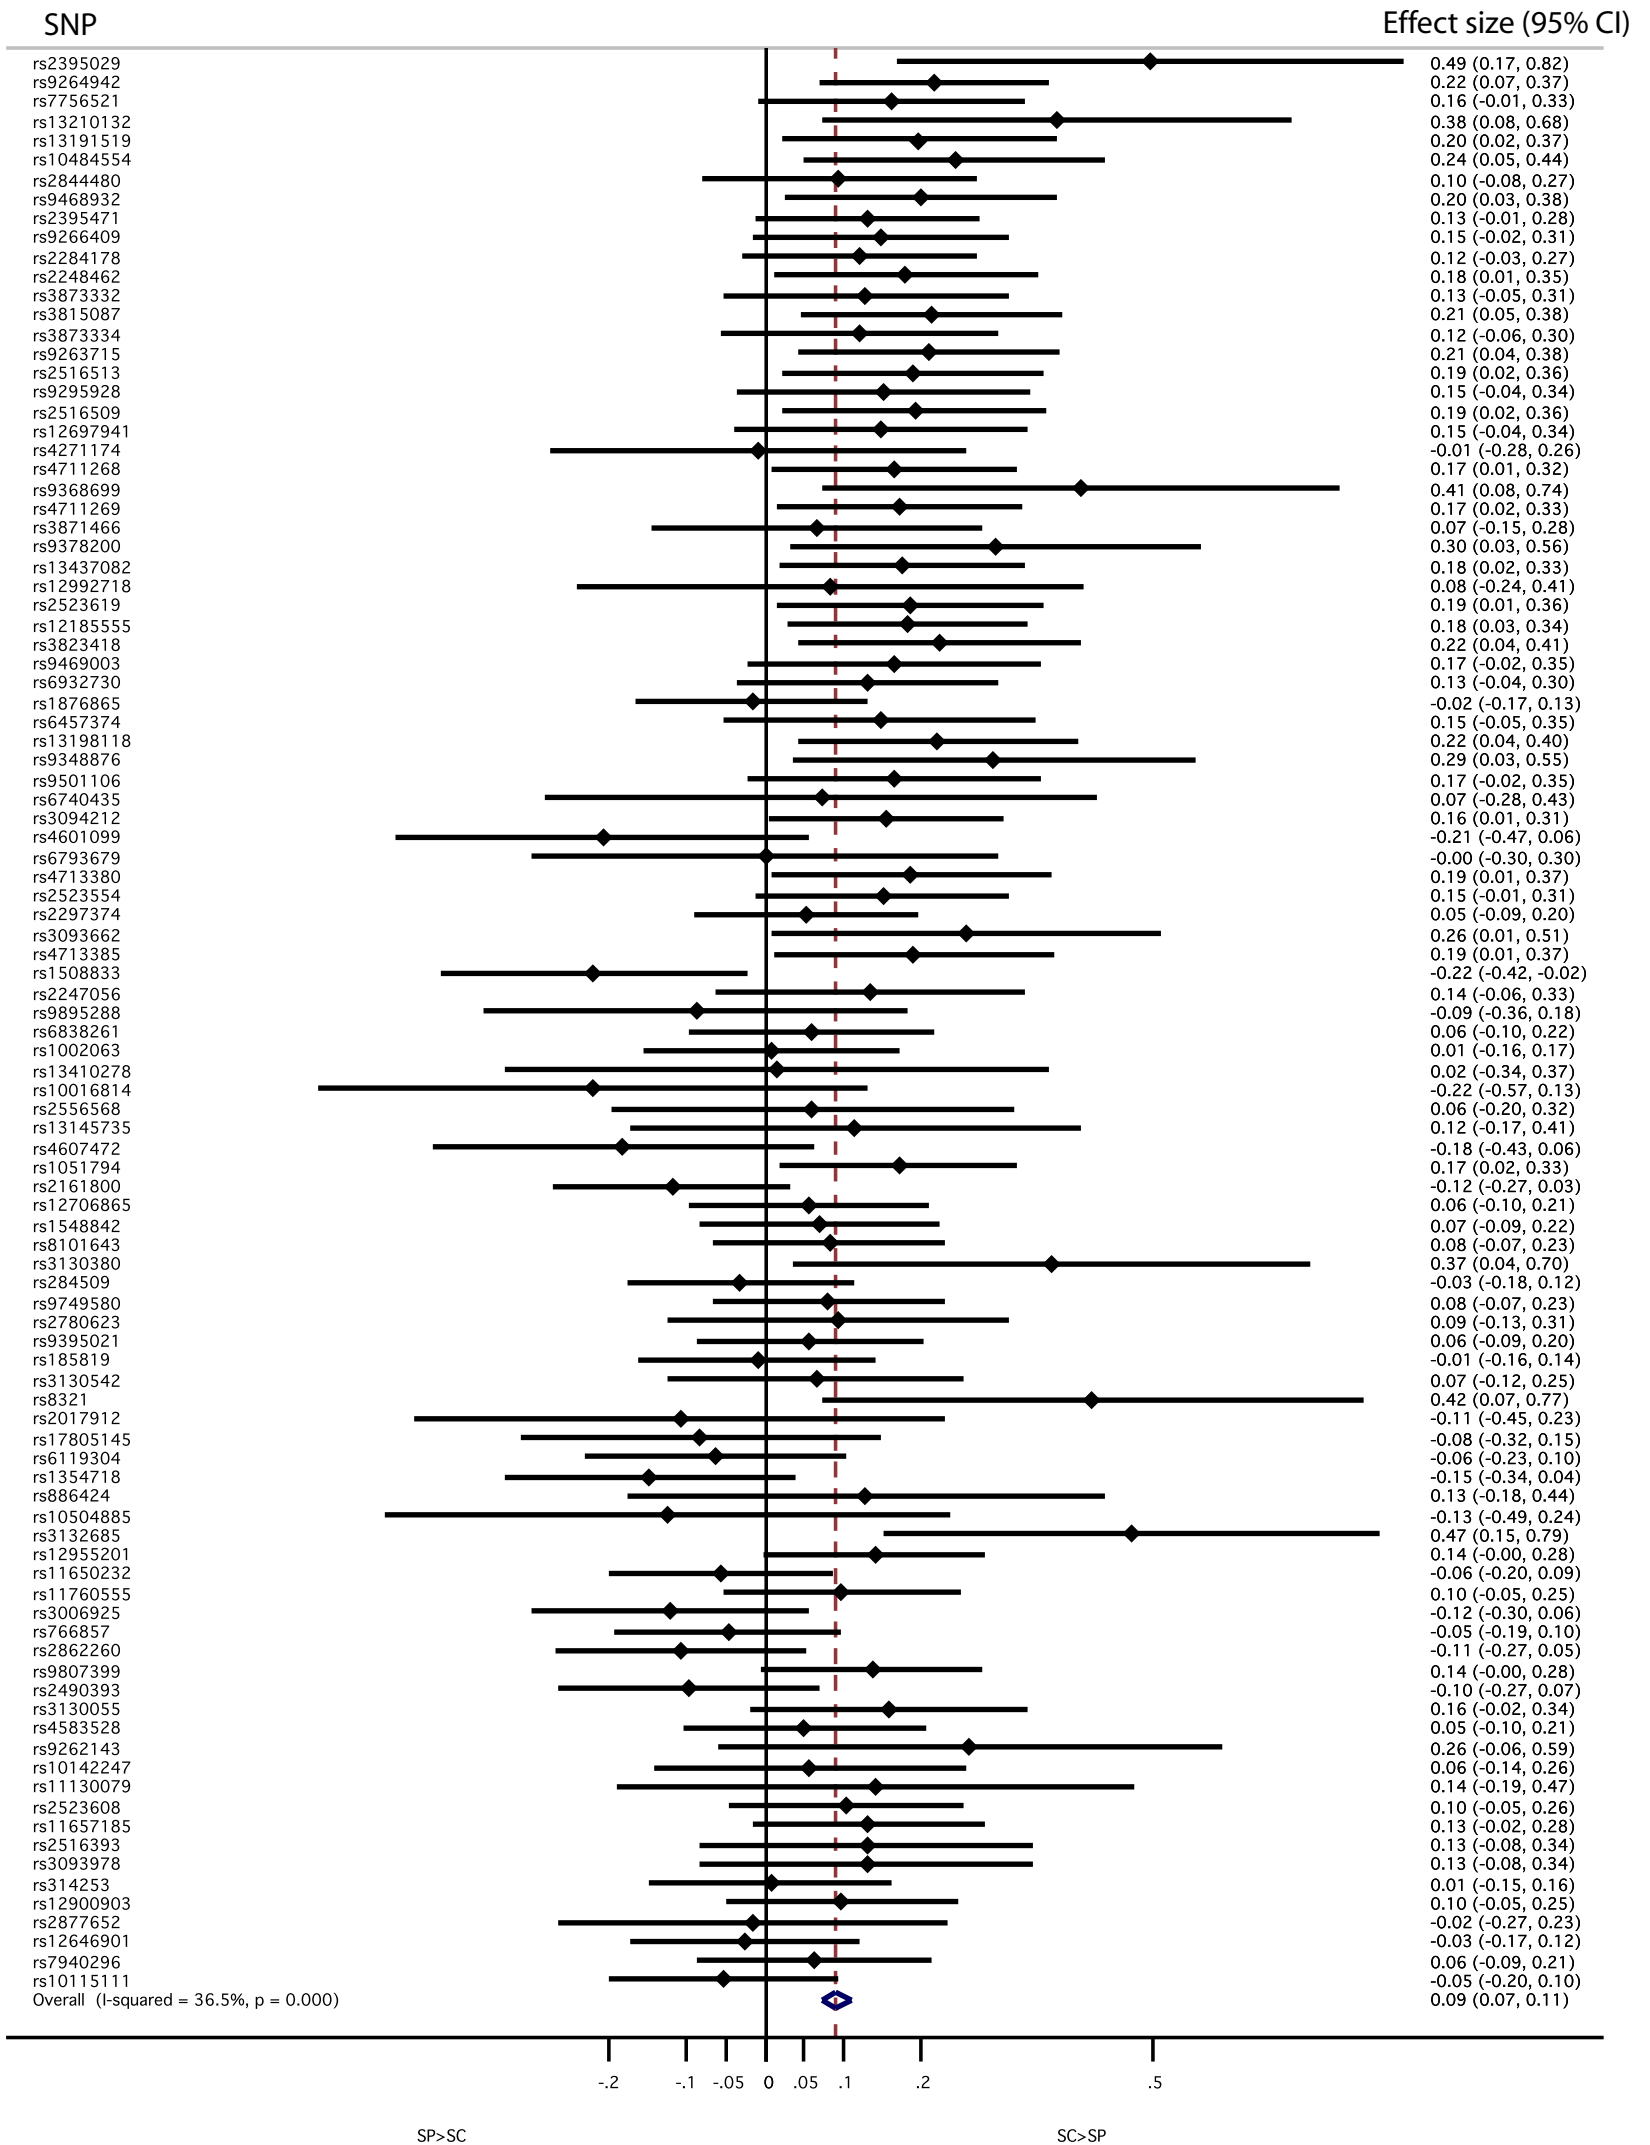

Supplement: supp_kwr024_kwr024_Web_Material.pdf [file supp_kwr024_kwr024_Web_Material.pdf]
